# Supplementary material
Source: publisher site journal article supplement (https://www.dovepress.com/article/450094)
Supplement: Supplementary file 1 [file get_supplementary_file.php]

Supplementary Table 1 The venn analysis of luteolin targets

| TCMSP | SymMap | BATMAN-T<br>CM | TCMSP Sym<br>Map | TCMSP BATMAN<br>-TCM | TCMSP SymMap <br>BATMAN-TCM |
|-------|--------|----------------|------------------|----------------------|-----------------------------|
| DPP4  | CDK2   | ACTB           | PTGS2            | HSP90AA1             | AKT1                        |
|       | GSTP1  | AHR            | PRSS1            | PIK3CG               | TOP2A                       |
|       | MAPK3  | AKR1C1         | AR               | PRKACA               |                             |
|       | NOS2   | ATP5A1         | PTGS1            | NCOA2                |                             |
|       | VEGFA  | ATP5B          | RELA             |                      |                             |
|       | XIAP   | ATP5C1         | EGFR             |                      |                             |
|       |        | CA1            | CCND1            |                      |                             |
|       |        | CA12           | BCL2L1           |                      |                             |
|       |        | CA14           | CDKN1A           |                      |                             |
|       |        | CA2            | CASP9            |                      |                             |
|       |        | CA3            | MMP2             |                      |                             |
|       |        | CA4            | MMP9             |                      |                             |
|       |        | CA5A           | MAPK1            |                      |                             |
|       |        | CA5B           | IL10             |                      |                             |
|       |        | CA6            | RB1              |                      |                             |
|       |        | CA7            | CDK4             |                      |                             |
|       |        | CA9            | TNF              |                      |                             |
|       |        | CBR1           | JUN              |                      |                             |
|       |        | CDK6           | IL6              |                      |                             |
|       |        | CEBPB          | CASP3            |                      |                             |
|       |        | COMT           | TP53             |                      |                             |
|       |        | CSNK2A1        | NFKBIA           |                      |                             |
|       |        | CSNK2B         | XDH              |                      |                             |
|       |        | CYP19A1        | TOP1             |                      |                             |
|       |        | CYP1B1         | MDM2             |                      |                             |
|       |        | DHFRL1         | APP              |                      |                             |
|       |        | DNMT1          | MMP1             |                      |                             |
|       |        | EIF3F          | PCNA             |                      |                             |
|       |        | ESR1           | ERBB2            |                      |                             |
|       |        | ESR2           | PPARG            |                      |                             |
|       |        | ESRRA          | HMOX1            |                      |                             |
|       |        | ESRRB          | CASP7            |                      |                             |
|       |        | GABRA1         | ICAM1            |                      |                             |
|       |        | GABRA2         | MCL1             |                      |                             |
|       |        | GABRA3         | BIRC5            |                      |                             |
|       |        | GABRA4         | IL2              |                      |                             |
|       |        | GABRA5         | CCNB1            |                      |                             |
|       |        | GABRA6         | TYR              |                      |                             |
|       |        | GABRG1         | IFNG             |                      |                             |
|       |        | GABRG2         | IL4              |                      |                             |

|  |  |        |        |  |  |
|--|--|--------|--------|--|--|
|  |  | GABRG3 | SLC2A4 |  |  |
|  |  | GPER1  | INSR   |  |  |
|  |  | HCK    | CD40LG |  |  |
|  |  | HIBCH  | PTGES  |  |  |
|  |  | HSPA2  | NUF2   |  |  |
|  |  | IGHG1  | ADCY2  |  |  |
|  |  | JAK1   | MET    |  |  |
|  |  | KANSL3 |        |  |  |
|  |  | MTTP   |        |  |  |
|  |  | NCOA1  |        |  |  |
|  |  | NQO2   |        |  |  |
|  |  | NR1I2  |        |  |  |
|  |  | PIM1   |        |  |  |
|  |  | PRKCA  |        |  |  |
|  |  | PRKCB  |        |  |  |
|  |  | PTK2B  |        |  |  |
|  |  | RUVBL2 |        |  |  |
|  |  | SF3B3  |        |  |  |
|  |  | SHBG   |        |  |  |
|  |  | SOAT1  |        |  |  |
|  |  | SOAT2  |        |  |  |
|  |  | SQLE   |        |  |  |
|  |  | STK17B |        |  |  |
|  |  | SYK    |        |  |  |
|  |  | UBA1   |        |  |  |
|  |  | UGT3A1 |        |  |  |

Supplementary Table 2 The venn analysis of disease-related genes associated with DN

| OMIM    | DisGeNet | GeneCards | OMIM DisGeNet | OMIM GeneCards | DisGeNet GeneCards | OMIM DisGeNet GeneCards |
|---------|----------|-----------|---------------|----------------|--------------------|-------------------------|
| GNB1    | NFE2L2   | ABCC8     | NPPA          | PTPN22         | ACE                | REN                     |
| PRDM16  | TGFB1    | GCK       | SLC2A1        | LMNA           | ALB                | AGT                     |
| TP73    | MFN2     | KCNJ11    | LEPR          | NLRP3          | NOS3               | PPARG                   |
| CTRC    | TXNIP    | HNF1B     | IL1B          | KLF11          | SERPINE1           |                         |
| CELA2A  | ACE2     | PDX1      | CREB1         | IL1RN          | CCL2               |                         |
| CLCNKA  | CNDP1    | INSR      | FN1           | GPD2           | TGFB1              |                         |
| DDOST   | ELMO1    | WFS1      |               | NEUROD1        | VEGFA              |                         |
| ECE1    | RELA     | TCF7L2    |               | CTLA4          | ADIPOQ             |                         |
| C1QA    | GAS6     | PAX4      |               | IRS1           | INS                |                         |
| C1QC    | CNDP2    | SLC2A2    |               | CAPN10         | SOD2               |                         |
| C1QB    | AOC3     | ENPP1     |               |                | PON1               |                         |
| SELENON | CDKN1A   | SLC30A8   |               |                | HNF1A              |                         |

|          |          |          |  |  |        |  |
|----------|----------|----------|--|--|--------|--|
| NR0B2    | KDR      | RETN     |  |  | COL4A1 |  |
| FCN3     | KLK1     | AVPR2    |  |  | AGER   |  |
| SDC3     | MDK      | AQP2     |  |  | AGTR1  |  |
| CCDC28B  | TGFBR2   | AVP      |  |  | IL6    |  |
| LCK      | CST3     | IGF2BP2  |  |  | TNF    |  |
| TRIT1    | CCN2     | SLC2A4   |  |  | IGF1   |  |
| ZMPSTE24 | DGKH     | HFE      |  |  | HNF4A  |  |
| MMACHC   | HAVCR1   | IRS2     |  |  |        |  |
| PRDX1    | TINAG    | LIPC     |  |  |        |  |
| TAL1     | HIF1A    | AKR1B1   |  |  |        |  |
| ANGPTL3  | ICAM1    | MTNR1B   |  |  |        |  |
| JAK1     | LCN2     | AKT2     |  |  |        |  |
| ACADM    | MIR145   | PTPN1    |  |  |        |  |
| ALX3     | MMP9     | INS-IGF2 |  |  |        |  |
| SLC16A1  | MYCN     | UMOD     |  |  |        |  |
| VANGL1   | NOX4     | APOE     |  |  |        |  |
| NOTCH2   | AXL      | COL4A5   |  |  |        |  |
| HJV      | PRKCE    | MIR21    |  |  |        |  |
| TPM3     | PTEN     | MIR29A   |  |  |        |  |
| IL6R     | PTPN11   | HLA-DQB1 |  |  |        |  |
| MUC1     | TNFAIP1  | APOA1    |  |  |        |  |
| NCSTN    | TRPC6    | EPO      |  |  |        |  |
| CD244    | VDAC1    | CEL      |  |  |        |  |
| USF1     | VDAC2    | HLA-DQA1 |  |  |        |  |
| PPOX     | ALPK1    | MTHFR    |  |  |        |  |
| MPZ      | KL       | LEP      |  |  |        |  |
| ATF6     | MTOR     | MIR192   |  |  |        |  |
| PBX1     | BMP7     | CRP      |  |  |        |  |
| SLC19A2  | MMP2     | BLK      |  |  |        |  |
| F5       | SERPINF1 | APPL1    |  |  |        |  |
| RC3H1    | PRKCB    | MT-TL1   |  |  |        |  |
| NPHS2    | PTGS2    | GCG      |  |  |        |  |
| HMCN1    | HMOX1    | HLA-DRB1 |  |  |        |  |
| CFH      | STAT3    | ZFP57    |  |  |        |  |
| CFHR3    | CAT      | XPNPEP3  |  |  |        |  |
| CFHR1    | GSK3B    |          |  |  |        |  |
| CFHR5    | JAK2     |          |  |  |        |  |
| PTPRC    | AGTR2    |          |  |  |        |  |
| PPP1R15B | TP53     |          |  |  |        |  |
| SLC41A1  | TRPC1    |          |  |  |        |  |
| IL10     | PRMT1    |          |  |  |        |  |
| HSD11B1  | IGF2     |          |  |  |        |  |
| KCNH1    | SPP1     |          |  |  |        |  |

|              |         |  |  |  |  |  |
|--------------|---------|--|--|--|--|--|
| MIA3         | SREBF1  |  |  |  |  |  |
| COQ8A        | CASP3   |  |  |  |  |  |
| ACTA1        | UTS2    |  |  |  |  |  |
| ARV1         | CLU     |  |  |  |  |  |
| IRF2BP2      | CYP19A1 |  |  |  |  |  |
| LPIN1        | NQO1    |  |  |  |  |  |
| ADCY3        | G6PD    |  |  |  |  |  |
| POMC         | GHR     |  |  |  |  |  |
| DNMT3A       | HSPA5   |  |  |  |  |  |
| KHK          | ERRFI1  |  |  |  |  |  |
| MPV17        | CCL20   |  |  |  |  |  |
| GCKR         | SELP    |  |  |  |  |  |
| SIX3         | SPARC   |  |  |  |  |  |
| TTC7A        | TIMP2   |  |  |  |  |  |
| MSH6         | C3      |  |  |  |  |  |
| ALMS1        | VCAM1   |  |  |  |  |  |
| DGUOK        | CUBN    |  |  |  |  |  |
| TET3         | BECN1   |  |  |  |  |  |
| ST3GAL5      | CD36    |  |  |  |  |  |
| CD8A         | HDAC4   |  |  |  |  |  |
| EIF2AK3      | EP300   |  |  |  |  |  |
| NPHP1        | ESR1    |  |  |  |  |  |
| GLI2         | DKK1    |  |  |  |  |  |
| RNU4ATA<br>C | UTS2R   |  |  |  |  |  |
| PROC         | HSPB1   |  |  |  |  |  |
| CXCR4        | HTR2A   |  |  |  |  |  |
| ZEB2         | IGF1R   |  |  |  |  |  |
| IFIH1        | LAMB2   |  |  |  |  |  |
| GAD1         | NOS1    |  |  |  |  |  |
| DCAF17       | ATP5F1B |  |  |  |  |  |
| SLC40A1      | PROS1   |  |  |  |  |  |
| MSTN         | C5      |  |  |  |  |  |
| STAT1        | FGF23   |  |  |  |  |  |
| CASP10       | CASP9   |  |  |  |  |  |
| CPS1         | TRIP10  |  |  |  |  |  |
| SMARCAL<br>1 | KEAP1   |  |  |  |  |  |
| SLC11A1      |         |  |  |  |  |  |
| COL4A4       |         |  |  |  |  |  |
| COL4A3       |         |  |  |  |  |  |
| UGT1A1       |         |  |  |  |  |  |
| ITPR1        |         |  |  |  |  |  |

|       |  |  |  |  |  |  |
|-------|--|--|--|--|--|--|
| CAV3  |  |  |  |  |  |  |
| CIDEC |  |  |  |  |  |  |
| GHRL  |  |  |  |  |  |  |
| PLCD1 |  |  |  |  |  |  |

Supplementary Table 3 The PPI network of luteolin-DN targets

| #node1 | node2    | experimentally_determined_interaction | database_annotated | combined_score |
|--------|----------|---------------------------------------|--------------------|----------------|
| ACE    | AGT      | 0.822                                 | 0.9                | 0.981          |
| ADCY2  | PRKACA   | 0.139                                 | 0.65               | 0.685          |
| ADCY2  | AKT1     | 0.058                                 | 0.6                | 0.607          |
| ADIPOQ | PPARG    | 0                                     | 0.9                | 0.9            |
| ADIPOQ | NCOA2    | 0                                     | 0.9                | 0.9            |
| AGER   | MAPK1    | 0                                     | 0.6                | 0.6            |
| AGER   | APP      | 0.042                                 | 0.6                | 0.6            |
| AGER   | RELA     | 0                                     | 0.9                | 0.9            |
| AGT    | MAPK1    | 0                                     | 0.9                | 0.9            |
| AGT    | REN      | 0.936                                 | 0.9                | 0.993          |
| AGT    | APP      | 0.068                                 | 0.5                | 0.514          |
| AGT    | NCOA2    | 0                                     | 0.9                | 0.9            |
| AGT    | AGTR1    | 0.501                                 | 0.9                | 0.947          |
| AGTR1  | SERPINE1 | 0.056                                 | 0.8                | 0.803          |
| AKT1   | MAPK1    | 0.148                                 | 0.8                | 0.822          |
| AKT1   | IL2      | 0                                     | 0.9                | 0.9            |
| AKT1   | MDM2     | 0.898                                 | 0.9                | 0.989          |
| AKT1   | RB1      | 0.058                                 | 0.9                | 0.901          |
| AKT1   | TP53     | 0.201                                 | 0.9                | 0.916          |
| AKT1   | EGFR     | 0.65                                  | 0                  | 0.65           |
| AKT1   | NOS3     | 0.879                                 | 0.9                | 0.987          |
| AKT1   | BCL2L1   | 0.27                                  | 0.9                | 0.923          |
| AKT1   | INSR     | 0.182                                 | 0.9                | 0.914          |
| AKT1   | CTLA4    | 0.056                                 | 0.65               | 0.655          |
| AKT1   | IRS1     | 0.535                                 | 0                  | 0.535          |
| AKT1   | CASP3    | 0.475                                 | 0                  | 0.475          |
| AKT1   | CASP9    | 0.231                                 | 0.9                | 0.919          |
| AKT1   | HSP90AA1 | 0.946                                 | 0.9                | 0.994          |
| AKT1   | PIK3CG   | 0.184                                 | 0.9                | 0.914          |
| AKT1   | LMNA     | 0.605                                 | 0                  | 0.605          |
| AKT1   | MCL1     | 0                                     | 0.9                | 0.9            |
| AKT1   | CD40LG   | 0.056                                 | 0.9                | 0.901          |
| AKT1   | JUN      | 0.057                                 | 0.8                | 0.803          |
| AKT1   | AR       | 0.87                                  | 0                  | 0.87           |
| AKT1   | INS      | 0                                     | 0.9                | 0.9            |

|        |          |       |      |       |
|--------|----------|-------|------|-------|
| AKT1   | CDKN1A   | 0.789 | 0.9  | 0.978 |
| AKT1   | CREB1    | 0.27  | 0.9  | 0.923 |
| AKT1   | SOD2     | 0     | 0.9  | 0.9   |
| ALB    | NCOA2    | 0     | 0.65 | 0.65  |
| APP    | MAPK1    | 0.086 | 0.6  | 0.619 |
| APP    | MMP2     | 0.464 | 0    | 0.463 |
| APP    | TGFB1    | 0.734 | 0    | 0.734 |
| APP    | PON1     | 0     | 0.72 | 0.72  |
| APP    | EGFR     | 0.642 | 0    | 0.642 |
| APP    | NPPA     | 0     | 0.5  | 0.499 |
| APP    | PRSS1    | 0.651 | 0    | 0.651 |
| APP    | INS      | 0     | 0.5  | 0.499 |
| APP    | COL4A1   | 0.451 | 0    | 0.451 |
| APP    | HSP90AA1 | 0.494 | 0    | 0.494 |
| APP    | RELA     | 0     | 0.9  | 0.9   |
| APP    | CASP3    | 0.682 | 0    | 0.682 |
| AR     | MAPK1    | 0.497 | 0    | 0.497 |
| AR     | CCND1    | 0.839 | 0.9  | 0.983 |
| AR     | MDM2     | 0.898 | 0    | 0.898 |
| AR     | RB1      | 0.687 | 0.65 | 0.885 |
| AR     | TP53     | 0.474 | 0    | 0.474 |
| AR     | EGFR     | 0.698 | 0    | 0.698 |
| AR     | PRKACA   | 0     | 0.9  | 0.9   |
| AR     | HSP90AA1 | 0.884 | 0.9  | 0.987 |
| AR     | JUN      | 0.499 | 0    | 0.499 |
| AR     | RELA     | 0.489 | 0    | 0.489 |
| AR     | NCOA2    | 0.977 | 0.9  | 0.997 |
| BCL2L1 | MAPK1    | 0     | 0.9  | 0.9   |
| BCL2L1 | TP53     | 0.977 | 0.9  | 0.997 |
| BCL2L1 | PRKACA   | 0     | 0.9  | 0.9   |
| BCL2L1 | MCL1     | 0.5   | 0.9  | 0.947 |
| BCL2L1 | CASP9    | 0.724 | 0    | 0.724 |
| BIRC5  | CCND1    | 0     | 0.9  | 0.9   |
| BIRC5  | TP53     | 0     | 0.9  | 0.9   |
| BIRC5  | CASP3    | 0.567 | 0    | 0.567 |
| BIRC5  | CASP7    | 0.729 | 0    | 0.729 |
| BIRC5  | CASP9    | 0.771 | 0    | 0.771 |
| CASP3  | MAPK1    | 0.057 | 0.8  | 0.803 |
| CASP3  | MDM2     | 0.875 | 0    | 0.875 |
| CASP3  | RB1      | 0.488 | 0.9  | 0.946 |
| CASP3  | MET      | 0.609 | 0    | 0.609 |
| CASP3  | CASP7    | 0.271 | 0.9  | 0.923 |
| CASP3  | TOP1     | 0.263 | 0.9  | 0.923 |

|        |          |       |      |       |
|--------|----------|-------|------|-------|
| CASP3  | CASP9    | 0.87  | 0.9  | 0.986 |
| CASP3  | CDKN1A   | 0.77  | 0.8  | 0.952 |
| CASP7  | RB1      | 0.675 | 0    | 0.675 |
| CASP7  | CASP9    | 0.271 | 0.9  | 0.923 |
| CASP9  | MAPK1    | 0.282 | 0.9  | 0.925 |
| CCL2   | RELA     | 0.486 | 0.8  | 0.892 |
| CCL2   | JUN      | 0     | 0.9  | 0.9   |
| CCL2   | IL4      | 0     | 0.9  | 0.9   |
| CCL2   | IL10     | 0     | 0.9  | 0.9   |
| CCL2   | TNF      | 0     | 0.9  | 0.9   |
| CCL2   | IL1B     | 0     | 0.9  | 0.9   |
| CCL2   | IL6      | 0     | 0.9  | 0.9   |
| CCNB1  | CCND1    | 0.078 | 0.9  | 0.903 |
| CCNB1  | RB1      | 0.547 | 0    | 0.547 |
| CCNB1  | LMNA     | 0     | 0.9  | 0.9   |
| CCNB1  | PCNA     | 0.685 | 0.36 | 0.789 |
| CCNB1  | CDK4     | 0.23  | 0.9  | 0.919 |
| CCNB1  | CDKN1A   | 0.898 | 0.9  | 0.989 |
| CCND1  | HNF1A    | 0     | 0.9  | 0.9   |
| CCND1  | CREB1    | 0     | 0.9  | 0.9   |
| CCND1  | RELA     | 0.486 | 0.9  | 0.946 |
| CCND1  | JUN      | 0.27  | 0.9  | 0.923 |
| CCND1  | PCNA     | 0.783 | 0.9  | 0.977 |
| CCND1  | RB1      | 0.947 | 0.9  | 0.994 |
| CCND1  | CDKN1A   | 0.983 | 0.9  | 0.998 |
| CCND1  | CDK4     | 0.998 | 0.9  | 0.999 |
| CD40LG | NFKBIA   | 0.062 | 0.9  | 0.902 |
| CD40LG | PIK3CG   | 0.056 | 0.9  | 0.901 |
| CD40LG | TNF      | 0     | 0.6  | 0.6   |
| CD40LG | RELA     | 0     | 0.9  | 0.9   |
| CDK4   | TP53     | 0.498 | 0    | 0.498 |
| CDK4   | HSP90AA1 | 0.889 | 0    | 0.889 |
| CDK4   | CDKN1A   | 0.985 | 0.9  | 0.998 |
| CDK4   | PCNA     | 0.98  | 0.9  | 0.997 |
| CDK4   | RB1      | 0.993 | 0.9  | 0.999 |
| CDKN1A | MDM2     | 0.872 | 0    | 0.872 |
| CDKN1A | RB1      | 0.37  | 0.9  | 0.934 |
| CDKN1A | TP53     | 0.968 | 0.9  | 0.996 |
| CDKN1A | HSP90AA1 | 0.27  | 0.6  | 0.695 |
| CDKN1A | MCL1     | 0     | 0.9  | 0.9   |
| CDKN1A | JUN      | 0.27  | 0.9  | 0.923 |
| CDKN1A | PCNA     | 0.998 | 0.9  | 0.999 |
| CDKN1A | RELA     | 0.486 | 0    | 0.485 |

|        |          |       |     |       |
|--------|----------|-------|-----|-------|
| CDKN1A | CREB1    | 0     | 0.9 | 0.9   |
| COL4A1 | MMP9     | 0.442 | 0   | 0.442 |
| CREB1  | MAPK1    | 0     | 0.9 | 0.9   |
| CREB1  | HMOX1    | 0     | 0.9 | 0.9   |
| CREB1  | TP53     | 0.805 | 0   | 0.805 |
| CREB1  | NOS3     | 0     | 0.9 | 0.9   |
| CREB1  | PRKACA   | 0.487 | 0.9 | 0.946 |
| CREB1  | JUN      | 0.492 | 0.9 | 0.947 |
| CREB1  | IL6      | 0     | 0.9 | 0.9   |
| CREB1  | IL10     | 0     | 0.9 | 0.9   |
| CREB1  | VEGFA    | 0.27  | 0.9 | 0.923 |
| EGFR   | MAPK1    | 0.44  | 0.9 | 0.941 |
| EGFR   | IL2      | 0     | 0.6 | 0.6   |
| EGFR   | IFNG     | 0     | 0.6 | 0.6   |
| EGFR   | IL4      | 0     | 0.6 | 0.6   |
| EGFR   | MDM2     | 0     | 0.6 | 0.6   |
| EGFR   | ERBB2    | 0.982 | 0.9 | 0.998 |
| EGFR   | PRKACA   | 0.487 | 0   | 0.487 |
| EGFR   | INSR     | 0.107 | 0.5 | 0.534 |
| EGFR   | LMNA     | 0.486 | 0   | 0.485 |
| EGFR   | PTPN22   | 0.682 | 0   | 0.682 |
| EGFR   | IL10     | 0     | 0.6 | 0.6   |
| EGFR   | IL6      | 0     | 0.6 | 0.6   |
| EGFR   | IGF1     | 0     | 0.6 | 0.6   |
| EGFR   | INS      | 0     | 0.8 | 0.8   |
| EGFR   | VEGFA    | 0     | 0.6 | 0.6   |
| EGFR   | MET      | 0.887 | 0   | 0.887 |
| EGFR   | IRS1     | 0.251 | 0.6 | 0.687 |
| EGFR   | HSP90AA1 | 0.884 | 0.9 | 0.987 |
| ERBB2  | IRS1     | 0.251 | 0.6 | 0.687 |
| ERBB2  | INS      | 0     | 0.6 | 0.6   |
| ERBB2  | PRKACA   | 0     | 0.9 | 0.9   |
| ERBB2  | VEGFA    | 0     | 0.6 | 0.6   |
| ERBB2  | IGF1     | 0     | 0.6 | 0.6   |
| ERBB2  | IL6      | 0     | 0.9 | 0.9   |
| ERBB2  | HSP90AA1 | 0.907 | 0.9 | 0.99  |
| FN1    | MAPK1    | 0     | 0.6 | 0.6   |
| FN1    | IL4      | 0     | 0.9 | 0.9   |
| FN1    | IGF1     | 0     | 0.9 | 0.9   |
| FN1    | IRS1     | 0     | 0.9 | 0.9   |
| FN1    | PRKACA   | 0     | 0.9 | 0.9   |
| FN1    | LMNA     | 0.074 | 0.6 | 0.613 |
| HMOX1  | IL4      | 0     | 0.9 | 0.9   |



|          |        |       |     |       |
|----------|--------|-------|-----|-------|
| HMOX1    | JUN    | 0     | 0.9 | 0.9   |
| HNF1A    | MAPK1  | 0     | 0.9 | 0.9   |
| HNF1A    | HNF4A  | 0.241 | 0.9 | 0.92  |
| HNF4A    | TP53   | 0.43  | 0   | 0.43  |
| HNF4A    | NCOA2  | 0.831 | 0   | 0.831 |
| HSP90AA1 | MAPK1  | 0.365 | 0.9 | 0.933 |
| HSP90AA1 | IL2    | 0     | 0.9 | 0.9   |
| HSP90AA1 | IFNG   | 0     | 0.9 | 0.9   |
| HSP90AA1 | MDM2   | 0.675 | 0   | 0.675 |
| HSP90AA1 | RB1    | 0.128 | 0.9 | 0.909 |
| HSP90AA1 | TP53   | 0.899 | 0.9 | 0.989 |
| HSP90AA1 | NOS3   | 0.76  | 0.9 | 0.974 |
| HSP90AA1 | PRKACA | 0.654 | 0.9 | 0.963 |
| HSP90AA1 | MET    | 0.55  | 0   | 0.55  |
| HSP90AA1 | MCL1   | 0.128 | 0.9 | 0.909 |
| HSP90AA1 | VEGFA  | 0.27  | 0.9 | 0.923 |
| HSP90AA1 | NLRP3  | 0.27  | 0.8 | 0.847 |
| ICAM1    | RELA   | 0.681 | 0   | 0.681 |
| ICAM1    | IL10   | 0     | 0.9 | 0.9   |
| IFNG     | LEPR   | 0     | 0.6 | 0.6   |
| IFNG     | RELA   | 0     | 0.9 | 0.9   |
| IFNG     | JUN    | 0     | 0.9 | 0.9   |
| IGF1     | MAPK1  | 0     | 0.9 | 0.9   |
| IGF1     | MMP2   | 0     | 0.9 | 0.9   |
| IGF1     | MET    | 0     | 0.6 | 0.6   |
| IGF1     | MMP1   | 0     | 0.9 | 0.9   |
| IGF1     | IRS1   | 0     | 0.9 | 0.9   |
| IGF1     | INS    | 0     | 0.8 | 0.8   |
| IGF1     | INSR   | 0.945 | 0.8 | 0.988 |
| IL10     | MMP2   | 0     | 0.9 | 0.9   |
| IL10     | TGFB1  | 0     | 0.9 | 0.9   |
| IL10     | IL1RN  | 0     | 0.9 | 0.9   |
| IL10     | IL1B   | 0     | 0.9 | 0.9   |
| IL10     | MMP1   | 0     | 0.9 | 0.9   |
| IL10     | LEPR   | 0     | 0.6 | 0.6   |
| IL10     | MMP9   | 0     | 0.9 | 0.9   |
| IL10     | TNF    | 0     | 0.9 | 0.9   |
| IL10     | VEGFA  | 0     | 0.9 | 0.9   |
| IL1B     | IL4    | 0     | 0.9 | 0.9   |
| IL1B     | IL1RN  | 0     | 0.9 | 0.9   |
| IL1B     | JUN    | 0     | 0.8 | 0.8   |
| IL1B     | RELA   | 0     | 0.9 | 0.9   |
| IL1B     | TNF    | 0     | 0.5 | 0.499 |

|      |        |       |     |       |
|------|--------|-------|-----|-------|
| IL1B | NLRP3  | 0     | 0.8 | 0.8   |
| IL1B | IL6    | 0     | 0.9 | 0.9   |
| IL2  | MAPK1  | 0     | 0.9 | 0.9   |
| IL2  | LEPR   | 0     | 0.6 | 0.6   |
| IL2  | IRS1   | 0     | 0.9 | 0.9   |
| IL2  | JUN    | 0.27  | 0.9 | 0.923 |
| IL2  | RELA   | 0.486 | 0.9 | 0.946 |
| IL4  | LEPR   | 0     | 0.6 | 0.6   |
| IL4  | IRS1   | 0     | 0.9 | 0.9   |
| IL4  | RELA   | 0     | 0.9 | 0.9   |
| IL4  | JUN    | 0     | 0.9 | 0.9   |
| IL4  | IL6    | 0     | 0.9 | 0.9   |
| IL4  | TNF    | 0     | 0.9 | 0.9   |
| IL6  | MAPK1  | 0     | 0.9 | 0.9   |
| IL6  | MMP2   | 0     | 0.9 | 0.9   |
| IL6  | TGFB1  | 0     | 0.9 | 0.9   |
| IL6  | MMP1   | 0     | 0.9 | 0.9   |
| IL6  | LEPR   | 0.076 | 0.6 | 0.614 |
| IL6  | JUN    | 0     | 0.9 | 0.9   |
| IL6  | MMP9   | 0     | 0.9 | 0.9   |
| IL6  | RELA   | 0.27  | 0.9 | 0.923 |
| IL6  | VEGFA  | 0     | 0.9 | 0.9   |
| IL6  | TNF    | 0     | 0.9 | 0.9   |
| INS  | RB1    | 0.463 | 0   | 0.463 |
| INS  | INSR   | 0.972 | 0.9 | 0.997 |
| INS  | IRS1   | 0     | 0.9 | 0.9   |
| INS  | MET    | 0     | 0.6 | 0.6   |
| INS  | NPPA   | 0     | 0.5 | 0.499 |
| INSR | VEGFA  | 0     | 0.6 | 0.6   |
| INSR | IRS1   | 0.922 | 0.9 | 0.991 |
| IRS1 | MAPK1  | 0.213 | 0.9 | 0.917 |
| IRS1 | LEPR   | 0     | 0.6 | 0.6   |
| IRS1 | MET    | 0.132 | 0.6 | 0.637 |
| IRS1 | PIK3CG | 0.391 | 0.8 | 0.872 |
| JUN  | MAPK1  | 0.867 | 0.9 | 0.986 |
| JUN  | NFKBIA | 0     | 0.9 | 0.9   |
| JUN  | TGFB1  | 0     | 0.9 | 0.9   |
| JUN  | RB1    | 0.486 | 0.9 | 0.946 |
| JUN  | TP53   | 0.149 | 0.6 | 0.645 |
| JUN  | PPARG  | 0.066 | 0.9 | 0.902 |
| JUN  | NOS3   | 0     | 0.9 | 0.9   |
| JUN  | PRKACA | 0     | 0.8 | 0.8   |
| JUN  | MMP1   | 0.628 | 0   | 0.628 |

|        |        |       |      |       |
|--------|--------|-------|------|-------|
| JUN    | MMP9   | 0.486 | 0    | 0.485 |
| JUN    | VEGFA  | 0.182 | 0.9  | 0.914 |
| JUN    | TNF    | 0     | 0.9  | 0.9   |
| JUN    | RELA   | 0.481 | 0.9  | 0.945 |
| KLF11  | MAPK1  | 0.514 | 0    | 0.514 |
| LMNA   | MAPK1  | 0.251 | 0.6  | 0.687 |
| LMNA   | RB1    | 0.75  | 0    | 0.75  |
| MAPK1  | MCL1   | 0.463 | 0    | 0.463 |
| MAPK1  | PPARG  | 0.699 | 0    | 0.699 |
| MAPK1  | PRKACA | 0.18  | 0.8  | 0.828 |
| MAPK1  | MET    | 0.148 | 0.9  | 0.911 |
| MAPK1  | TGFB1  | 0.058 | 0.9  | 0.901 |
| MAPK1  | RB1    | 0.213 | 0.9  | 0.917 |
| MAPK1  | RELA   | 0.118 | 0.9  | 0.908 |
| MAPK1  | NFKBIA | 0.134 | 0.9  | 0.909 |
| MAPK1  | TP53   | 0.876 | 0.8  | 0.974 |
| MCL1   | TP53   | 0.298 | 0.9  | 0.926 |
| MDM2   | PCNA   | 0.486 | 0    | 0.485 |
| MDM2   | RB1    | 0.881 | 0.9  | 0.987 |
| MDM2   | TP53   | 0.998 | 0.9  | 0.999 |
| MET    | VEGFA  | 0     | 0.6  | 0.6   |
| MMP1   | MMP2   | 0     | 0.9  | 0.9   |
| MMP1   | TGFB1  | 0     | 0.9  | 0.9   |
| MMP1   | PRSS1  | 0     | 0.9  | 0.9   |
| MMP1   | MMP9   | 0     | 0.9  | 0.9   |
| MMP1   | VEGFA  | 0     | 0.9  | 0.9   |
| MMP2   | MMP9   | 0     | 0.9  | 0.9   |
| MMP2   | VEGFA  | 0     | 0.9  | 0.9   |
| MMP2   | TGFB1  | 0.634 | 0.9  | 0.961 |
| MMP9   | TGFB1  | 0.634 | 0.9  | 0.961 |
| MMP9   | PRSS1  | 0     | 0.9  | 0.9   |
| MMP9   | VEGFA  | 0     | 0.9  | 0.9   |
| NCOA2  | PPARG  | 0.954 | 0.9  | 0.995 |
| NFKBIA | PRKACA | 0.056 | 0.8  | 0.803 |
| NFKBIA | TP53   | 0.615 | 0    | 0.615 |
| NFKBIA | TNF    | 0.27  | 0.9  | 0.923 |
| NFKBIA | RELA   | 0.998 | 0.9  | 0.999 |
| NLRP3  | RELA   | 0     | 0.9  | 0.9   |
| NOS3   | PRKACA | 0.154 | 0.9  | 0.911 |
| NOS3   | VEGFA  | 0     | 0.9  | 0.9   |
| PCNA   | RB1    | 0     | 0.9  | 0.9   |
| PCNA   | TP53   | 0.486 | 0.65 | 0.812 |
| PCNA   | TOP1   | 0.955 | 0    | 0.955 |

|        |        |       |      |       |
|--------|--------|-------|------|-------|
| PPARG  | TGFB1  | 0     | 0.9  | 0.9   |
| PPARG  | RB1    | 0.297 | 0.9  | 0.926 |
| PPARG  | TP53   | 0.292 | 0.65 | 0.741 |
| PPARG  | TNF    | 0     | 0.9  | 0.9   |
| PPARG  | SLC2A4 | 0.056 | 0.9  | 0.901 |
| PPARG  | RELA   | 0.768 | 0.9  | 0.975 |
| PRKACA | VEGFA  | 0     | 0.9  | 0.9   |
| PRKACA | RELA   | 0.767 | 0.9  | 0.975 |
| PTGES  | PTGS1  | 0     | 0.9  | 0.9   |
| PTGES  | PTGS2  | 0     | 0.9  | 0.9   |
| PTGS1  | PTGS2  | 0.27  | 0.8  | 0.847 |
| PTGS2  | TP53   | 0.874 | 0    | 0.874 |
| RB1    | TP53   | 0.486 | 0.9  | 0.946 |
| RELA   | TGFB1  | 0     | 0.9  | 0.9   |
| RELA   | TP53   | 0.451 | 0    | 0.451 |
| RELA   | SOD2   | 0     | 0.9  | 0.9   |
| RELA   | TNF    | 0.501 | 0.9  | 0.948 |
| SLC2A1 | TP53   | 0.13  | 0.8  | 0.818 |
| SLC2A1 | SLC2A4 | 0     | 0.8  | 0.8   |
| TGFB1  | VEGFA  | 0     | 0.5  | 0.499 |
| TOP1   | TP53   | 0.735 | 0    | 0.735 |
| TOP1   | TOP2A  | 0.919 | 0    | 0.919 |

Supplementary Table 4 The venn analysis of important PPI network through MCC, MNC, DMNC algorithm

| DMNC   | MNC   | MCC DMNC | MCC MNC  | DMNC MNC | MCC DMNC MNC |
|--------|-------|----------|----------|----------|--------------|
| MCL1   | APP   | CCL2     | JUN      | ERBB2    | TP53         |
| NOS3   | CASP3 | CDK4     | IL6      |          | RB1          |
| PPARG  | INS   | IL10     | RELA     |          | TNF          |
| NFKBIA |       | CCNB1    | AKT1     |          | IL1B         |
| INSR   |       |          | IL4      |          | AR           |
| AGER   |       |          | MAPK1    |          | CDKN1A       |
| BIRC5  |       |          | HSP90AA1 |          | TGFB1        |
| CD40LG |       |          | VEGFA    |          | MMP1         |
| BCL2L1 |       |          | EGFR     |          | MMP9         |
| IL2    |       |          | IRS1     |          | MDM2         |
| MET    |       |          | PRKACA   |          | MMP2         |
|        |       |          | CREB1    |          | PCNA         |
|        |       |          |          |          | CCND1        |
|        |       |          |          |          | IGF1         |

Supplementary Table 5 The list of top 20 GO term

| category | Term       | ID                                                                             | count | p_value  | Rich_factor |
|----------|------------|--------------------------------------------------------------------------------|-------|----------|-------------|
| BP       | GO:1904707 | positive regulation of vascular smooth muscle cell proliferation               | 5     | 4.43E-08 | 0.089285714 |
| MF       | GO:0019899 | enzyme binding                                                                 | 7     | 1.13E-07 | 0.017948718 |
| BP       | GO:0001934 | positive regulation of protein phosphorylation                                 | 6     | 1.81E-07 | 0.028301887 |
| BP       | GO:0010628 | positive regulation of gene expression                                         | 7     | 5.69E-07 | 0.013333333 |
| BP       | GO:0000122 | negative regulation of transcription from RNA polymerase II promoter           | 8     | 1.05E-06 | 0.008221994 |
| BP       | GO:0051726 | regulation of cell cycle                                                       | 6     | 1.48E-06 | 0.018518519 |
| BP       | GO:0097421 | liver regeneration                                                             | 4     | 2.69E-06 | 0.095238095 |
| BP       | GO:0045944 | positive regulation of transcription from RNA polymerase II promoter           | 8     | 4.54E-06 | 0.00661157  |
| BP       | GO:1902895 | positive regulation of pri-miRNA transcription from RNA polymerase II promoter | 4     | 5.15E-06 | 0.076923077 |
| BP       | GO:0043491 | protein kinase B signaling                                                     | 4     | 5.15E-06 | 0.076923077 |
| BP       | GO:0071466 | cellular response to xenobiotic stimulus                                       | 4     | 1.01E-05 | 0.061538462 |
| BP       | GO:0048661 | positive regulation of smooth muscle cell proliferation                        | 4     | 1.27E-05 | 0.057142857 |
| BP       | GO:0030335 | positive regulation of cell migration                                          | 5     | 2.21E-05 | 0.018939394 |
| BP       | GO:0007265 | Ras protein signal transduction                                                | 4     | 2.70E-05 | 0.044444444 |
| BP       | GO:0042493 | response to drug                                                               | 5     | 3.32E-05 | 0.017064846 |
| BP       | GO:2000679 | positive regulation of transcription regulatory region DNA binding             | 3     | 4.36E-05 | 0.2         |
| BP       | GO:0010629 | negative regulation of gene expression                                         | 5     | 4.46E-05 | 0.015822785 |
| BP       | GO:0043065 | positive regulation of apoptotic process                                       | 5     | 5.40E-05 | 0.015060241 |
| BP       | GO:0045893 | positive regulation of transcription, DNA-templated                            | 6     | 7.28E-05 | 0.008287293 |
| BP       | GO:0030308 | negative regulation of cell growth                                             | 4     | 7.72E-05 | 0.03125     |

Supplementary Table 6 The list of top 20 KEGG pathway

| category | ID       | Term                                                 | count | p_value  | Rich_factor |
|----------|----------|------------------------------------------------------|-------|----------|-------------|
| KEGG     | hsa05215 | Prostate cancer                                      | 8     | 4.20E-11 | 0.082474227 |
| KEGG     | hsa01522 | Endocrine resistance                                 | 8     | 4.52E-11 | 0.081632653 |
| KEGG     | hsa05205 | Proteoglycans in cancer                              | 9     | 1.53E-10 | 0.043902439 |
| KEGG     | hsa05200 | Pathways in cancer                                   | 11    | 2.85E-10 | 0.020715631 |
| KEGG     | hsa04110 | Cell cycle                                           | 7     | 1.92E-08 | 0.05511811  |
| KEGG     | hsa05218 | Melanoma                                             | 6     | 5.51E-08 | 0.083333333 |
| KEGG     | hsa05214 | Glioma                                               | 6     | 6.78E-08 | 0.08        |
| KEGG     | hsa05220 | Chronic myeloid leukemia                             | 6     | 7.25E-08 | 0.078947368 |
| KEGG     | hsa05161 | Hepatitis B                                          | 7     | 8.27E-08 | 0.043209877 |
| KEGG     | hsa05163 | Human cytomegalovirus infection                      | 7     | 5.81E-07 | 0.031111111 |
| KEGG     | hsa04218 | Cellular senescence                                  | 6     | 2.65E-06 | 0.038461538 |
| KEGG     | hsa04115 | p53 signaling pathway                                | 5     | 3.88E-06 | 0.068493151 |
| KEGG     | hsa05212 | Pancreatic cancer                                    | 5     | 4.56E-06 | 0.065789474 |
| KEGG     | hsa05169 | Epstein-Barr virus infection                         | 6     | 9.43E-06 | 0.02970297  |
| KEGG     | hsa04933 | AGE-RAGE signaling pathway in diabetic complications | 5     | 1.37E-05 | 0.05        |
| KEGG     | hsa05166 | Human T-cell leukemia virus 1 infection              | 6     | 1.49E-05 | 0.027027027 |
| KEGG     | hsa04068 | FoxO signaling pathway                               | 5     | 3.97E-05 | 0.038167939 |
| KEGG     | hsa05418 | Fluid shear stress and atherosclerosis               | 5     | 5.01E-05 | 0.035971223 |
| KEGG     | hsa05224 | Breast cancer                                        | 5     | 6.24E-05 | 0.034013605 |
| KEGG     | hsa05226 | Gastric cancer                                       | 5     | 6.57E-05 | 0.033557047 |
